# Supplementary material for: Connectivity in gene coexpression networks negatively correlates with rates of molecular evolution in flowering plants
Source: PLoS One. 2017 Jul 31;12(7):e0182289. doi: 10.1371/journal.pone.0182289 (PMC5536297; doi:10.1371/journal.pone.0182289)
Supplement: S4 Appendix — (XLS) [file pone.0182289.s004.xls]

## Sheet: Sheet1
Connectivity across orthologous pairs
Connection number is conserved over time. A correlation matrix between the number of connections of orthologous pairs determined by reciprocal best BLAST hits (e-value <1E-08). Kendall's tau for each pairwise comparison is given on the lower half of the matrix, and the upper half are correpsonding P-values.
	A. thaliana	G. max	O. sativa	Populus spp.	S. lycopersicum	Vitis spp.	Z. mays
A. thaliana		<2.20E-16	<2.20E-16	2.317e-08	<2.20E-16	<2.20E-16	<2.20E-16
G. max	0.350934		0.00016	0.000711	4.947e-07	3.704e-06	7.286e-11
O. sativa	0.26495	0.139647		0.0002175	<2.20E-16	<2.20E-16	<2.20E-16
Populus spp.	0.220822	0.248187	0.190515		8.371e-05	0.002207	*0.09032
S. lycopersicum	0.4315	0.26459	0.32149	0.296902		<2.20E-16	<2.20E-16
Vitis spp.	0.34834	0.179804	0.384583	0.186386	0.416052		<2.20E-16
Z. mays	0.480083	0.359288	0.28808	0.171194	0.404573	0.440223
*Ranked ties – P-value may not be accurate.
